# Supplementary material for: Cassava Starch-Based Thermo-Responsive Pb(II)-Imprinted Material: Preparation and Adsorption Performance on Pb(II)
Source: MDPI journal article supplement (doi:10.3390/polym14040828), 2022-02-21
Supplement: s1 [file s1]

# Supplementary Material

## Cassava Starch-Based Thermo-Responsive Pb(II)-Imprinted Material: Preparation and Adsorption Performance on Pb(II)

Meiyuan Lv, Yuhan Du, Tingting Zhang, Xueyu Du\*, Xueqiong Yin\*

### 2.4. Adsorption performance and mechanism of CPIT

$$Q_t = \frac{(c_0 - c_t) \times V}{W} \quad (S1)$$

$$Q_e = \frac{(c_0 - c_e) \times V}{W} \quad (S2)$$

Where,  $c_0$  is the initial Pb(II) concentration of the solution prior to adsorption, mg/mL;  $c_t$  is the Pb(II) concentration of the solution after adsorption, mg/mL;  $c_e$  is the equilibrium Pb(II) concentration of the solution after adsorption, mg/mL;  $V$  is the total volume of the treated solution, mL;  $W$  is the dry weight of CPIT, g.

$$\ln(Q_e - Q_t) = \ln Q_e - k_1 t \quad (S3)$$

$$\frac{t}{Q_t} = \frac{1}{k_2 \cdot Q_e^2} + \frac{t}{Q_e} \quad (S4)$$

Where,  $Q_e$  is the equilibrium adsorption capacity, mg/g;  $Q_t$  is the adsorption capacity at time  $t$ , mg/g;  $k_1$  is the rate constant of the first-order kinetics,  $\text{min}^{-1}$ ;  $k_2$  is the rate constant of the second-order kinetics,  $\text{g}/(\text{mg} \cdot \text{min})$ .

$$\frac{1}{Q_e} = \frac{1}{Q_m} + \frac{1}{K_1 \cdot C_e \cdot Q_m} \quad (S5)$$

$$\ln Q_e = \ln K_f + \frac{1}{n} \ln C_e \quad (S6)$$

Where,  $Q_m$  is the theoretical maximum value of adsorption capacity, mg/g;  $C_e$  is the equilibrium value of Pb(II) concentration, g/L;  $K_1$  is the Langmuir adsorption equilibrium constant, L/mg;  $K_f$  and  $n$  are two constants for Freundlich isotherm model at a specific temperature.

## 2.5. Desorption and regeneration of CPIT

$$D\% = \frac{C_d \times V}{Q_e \times W} \times 100\% \quad (S7)$$

Where,  $C_d$  is the Pb(II) concentration of the resultant solution after desorption, mg/mL;  $V$  is the total volume of the resultant solution, mL;  $Q_e$  is the equilibrium adsorption capacity of CPIT, mg/g;  $W$  is the dry weight of CPIT, g.
